# Supplementary material for: Albocycline Is the Main Bioactive Antifungal Compound Produced by Streptomyces sp. OR6 against Verticillium dahliae
Source: MDPI journal article supplement (doi:10.3390/plants12203612), 2023-10-18

**Supplementary Material. Figure S2. (A)** HPLC chromatogram corresponding to the active fraction 5-6 obtained after fractionation of a *Streptomyces* sp. OR6 crude extract by vacuum flash chromatography (VFC). Note the presence of a majority peak with a retention time of 4.81 min corresponding to a compound identified as albocycline; **(B)** Spectra obtained by High-resolution electrospray ionization time-of-flight mass spectrometry (HR ESI-TOF-MS) of albocycline peak. Molecular ion  $m/z$  309.2008  $[M+H]^+$ , 331.1820  $[M+Na]^+$ , 639.3757  $[2M+Na]^+$ .

**A**

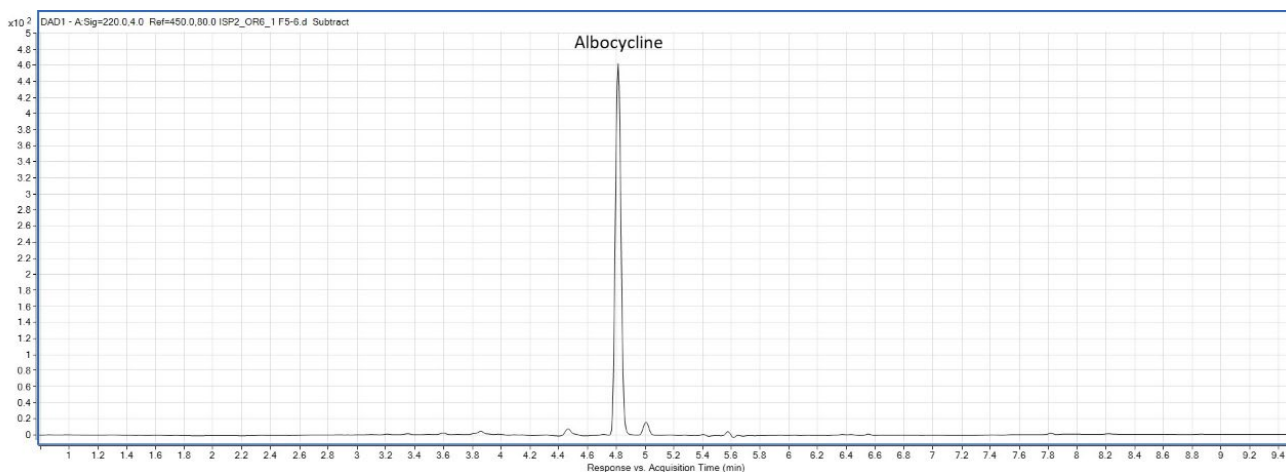

**B**

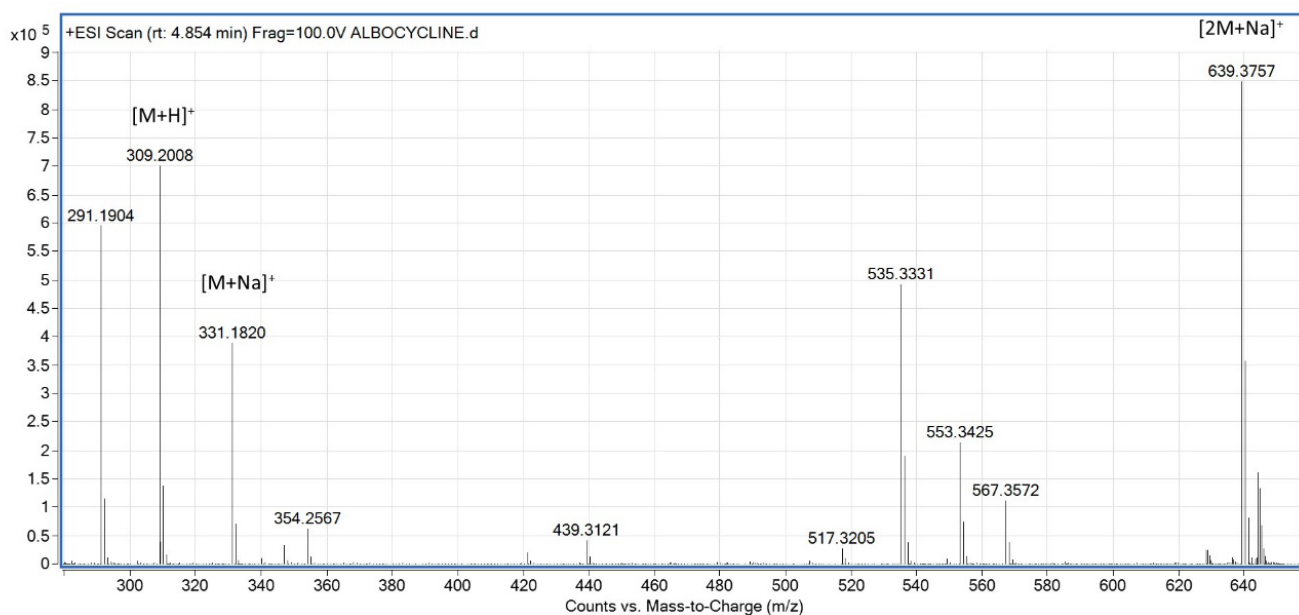

Supplement: s1 [file s1]
